# Supplementary material
Source: PubMed Central journal article supplement (PMC5576591)
Supplement: NIHMS887587-supplement-3.pdf [file NIHMS887587-supplement-3.pdf]

### 5.3 Supplementary Figures and Tables

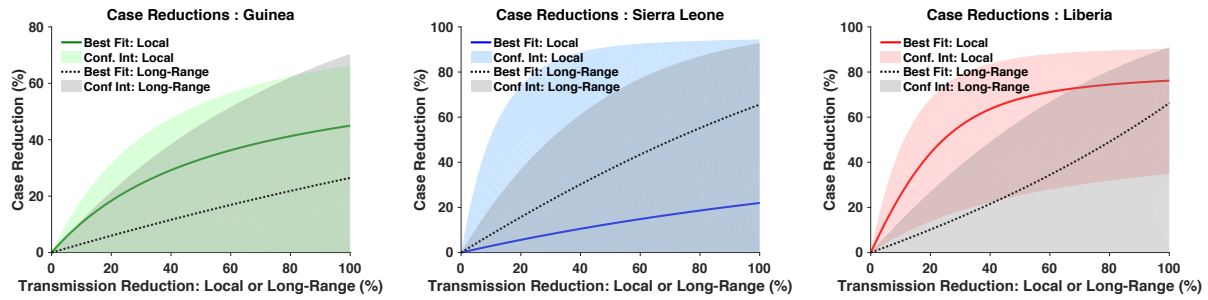

Figure A1: Cases reduced by various interventions at the country-level. Transmission reduction represents reduction of local or long-range transmission in increments of one percent. Case reduction is measured by comparing total cases in all 3 countries in the presence of intervention to total cases in the absence of intervention, on October 31, 2014.

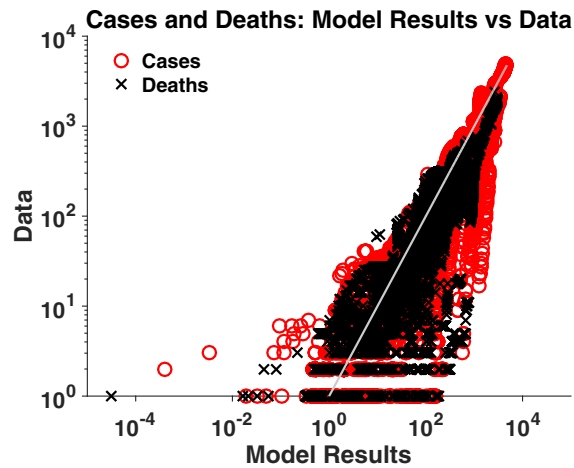

Figure A2: Comparison of all data points for cumulative cases and deaths in each of the 63 patches: comparison of deterministic model values (x axis) and data (y axis).  $R^2$  value of 0.8321.

## Guinea

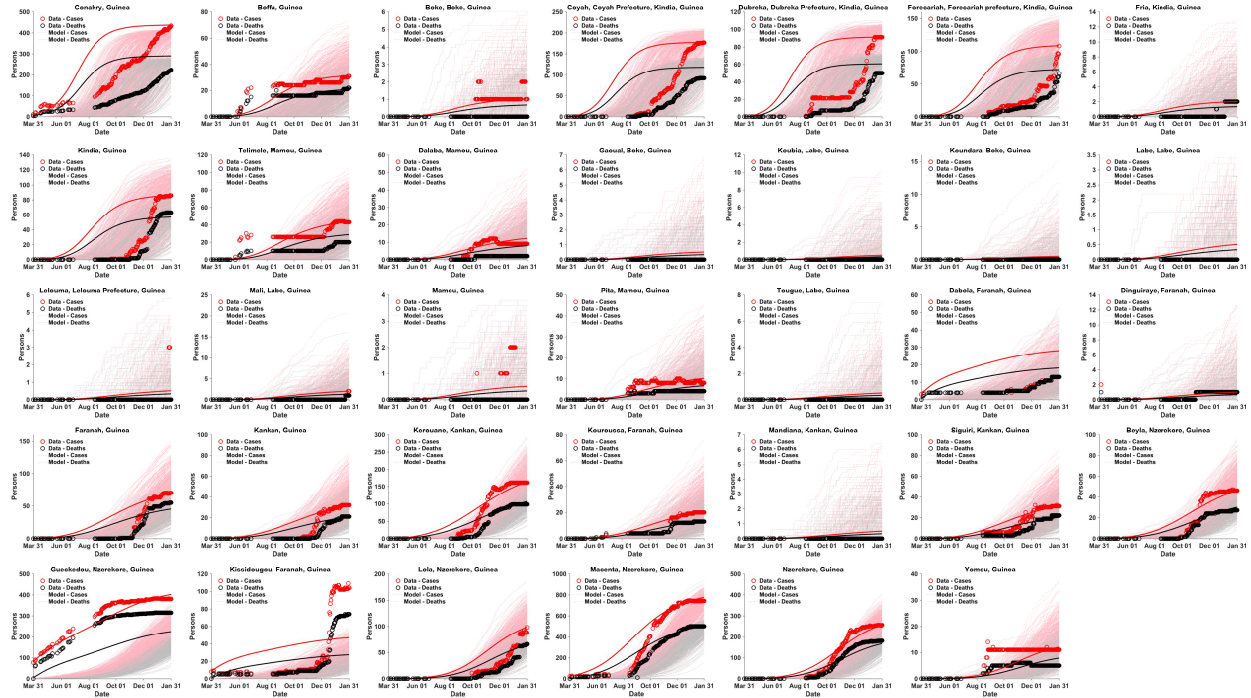

## Sierra Leone

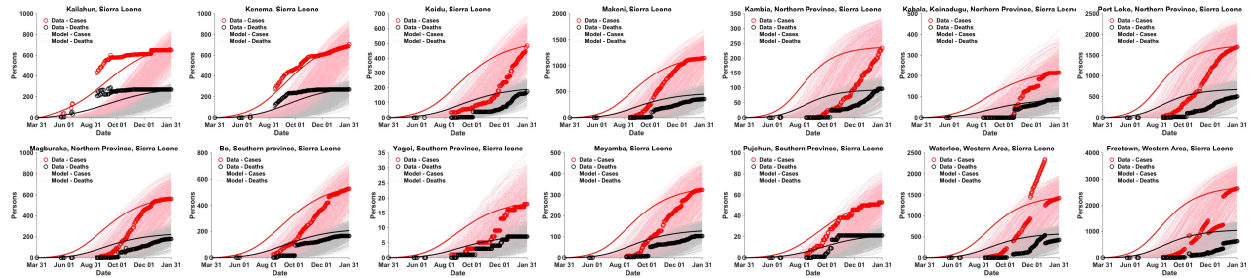

## Liberia

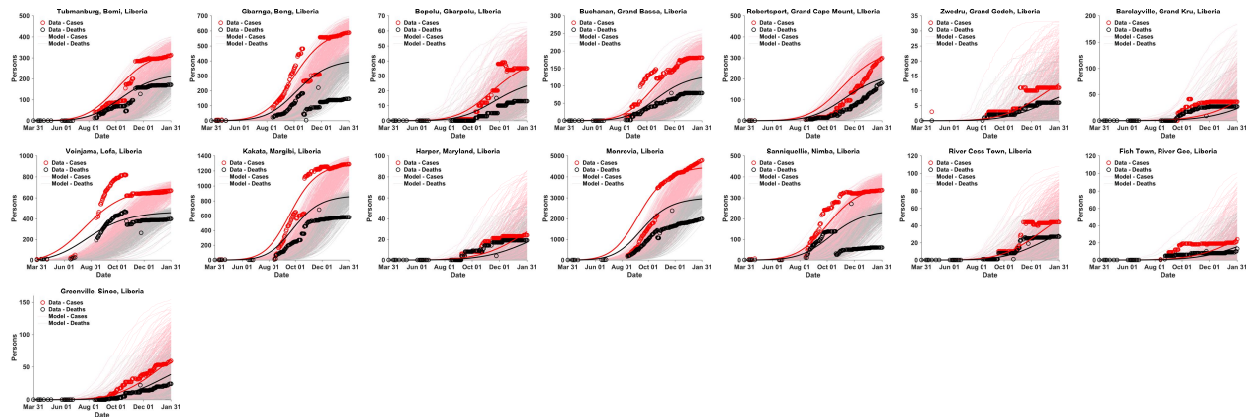

Figure A3: Cumulative cases and deaths for each district. Red and black circles represent data for cases and deaths, respectively. Thick red and black lines represent cumulative cases and deaths (respectively) in the deterministic model; thin pink and grey lines represent cases and deaths (respectively) trajectories sampled from the stochastic model with a reporting rate of 5 actual cases to each reported case for each patch ( $r = 1/5$ ), with the population at risk equal to  $5k_{norm}\rho_n$ . For the other reporting rates tested, see the Supplementary File containing Figures S1-S8. Model projections are from March 30, 2014 to January 31, 2015.

Table A1: Parameter values and estimates for the country-level model.

| Parameter                  | Definition                                                                     | Units                                                     | Best Fit      | Range                                                                  | Sources                                                      |
|----------------------------|--------------------------------------------------------------------------------|-----------------------------------------------------------|---------------|------------------------------------------------------------------------|--------------------------------------------------------------|
| $\alpha$                   | Transition rate from $E$ to $I_1$                                              | days <sup>-1</sup>                                        | 0.1059        | 0.1-0.125                                                              | [5, 58]                                                      |
| $\beta_{1G}$               | Transmission rate for $I_1$ in Guinea                                          | persons <sup>-1</sup><br>days <sup>-1</sup>               | 0.0950        | Initial: 0-0.5, Fitted: 0.0000 to 0.0676                               | fitted to data [1]                                           |
| $\beta_{1SL}$              | Transmission rate for $I_1$ in Sierra Leone                                    | persons <sup>-1</sup><br>days <sup>-1</sup>               | 0.0504        | Initial: 0-0.5, Fitted: 0.0005 to 0.1858                               | fitted to data [1]                                           |
| $\beta_{1L}$               | Transmission rate for $I_1$ in Liberia                                         | persons <sup>-1</sup><br>days <sup>-1</sup>               | 0.1555        | Initial: 0-0.5, Fitted: 0.0727 to 0.1656                               | fitted to data [1]                                           |
| $\beta_R$                  | Ratio of $I_1$ transmission to $I_2$ and $F$ transmission                      | none                                                      | 2.4565        | 1.5-3.0                                                                | [5, 15]                                                      |
| $\beta_{2G}, \beta_{FG}$   | Transmission rate for $I_2$ and $F$ in Guinea                                  | persons <sup>-1</sup><br>days <sup>-1</sup>               | 0.2335        | Calculated from $\beta_1$ and $\beta_R$                                | See $\beta_1, \beta_R$                                       |
| $\beta_{2SL}, \beta_{FSL}$ | Transmission rate for $I_2$ and $F$ in Sierra Leone                            | persons <sup>-1</sup><br>days <sup>-1</sup>               | 0.1238        | Calculated from $\beta_1$ and $\beta_R$                                | See $\beta_1, \beta_R$                                       |
| $\beta_{2L}, \beta_{FL}$   | Transmission rate for $I_2$ and $F$ in Liberia                                 | persons <sup>-1</sup><br>days <sup>-1</sup>               | 0.3820        | Calculated from $\beta_1$ and $\beta_R$                                | See $\beta_1, \beta_R$                                       |
| $\Delta_G$                 | Mortality for infected persons in Guinea                                       | none                                                      | 0.6643        | Initial: 0.5-0.9, Fitted: 0.3601 to 1.4023                             | fitted to data [1]                                           |
| $\Delta_{SL}$              | Mortality for infected persons in Sierra Leone                                 | none                                                      | 0.3910        | Initial: 0.5-0.9, Fitted: 0.2547 to 0.6159                             | fitted to data [1]                                           |
| $\Delta_L$                 | Mortality for infected persons in Liberia                                      | none                                                      | 0.6710        | Initial: 0.5-0.9, Fitted: 0.5453 to 0.8236                             | fitted to data [1]                                           |
| $\Delta_2$                 | Fraction of persons in $I_2$ that dies                                         | none                                                      | 0.9732        | 0.9-1.0                                                                | [5, 7]                                                       |
| $\delta$                   | Death rate for persons in $I_2$                                                | days <sup>-1</sup>                                        | 0.7597        | Calculated from $\Delta_2$ and $k_{02}$                                | see $\Delta_2$ and $k_{02}$                                  |
| $\delta_2$                 | Burial rate                                                                    | days <sup>-1</sup>                                        | 0.7425        | 0.3333-1.0                                                             | [31]                                                         |
| $k_{02}$                   | 1/duration of $I_2$                                                            | days <sup>-1</sup>                                        | 0.7806        | 0.3-0.8                                                                | [5, 34]                                                      |
| $k_{21}$                   | 1/duration of $I_1$                                                            | days <sup>-1</sup>                                        | 0.1822        | 0.1429 -0.2                                                            | [2, 34]                                                      |
| $\iota$                    | Distance exponent                                                              | unitless                                                  | 2             |                                                                        | fixed                                                        |
| $\kappa_1$                 | Between-patch coupling strength for Guinea                                     | km <sup><math>\iota</math></sup><br>persons <sup>-2</sup> | $10^{-10.17}$ | Initial: $10^{-8}$ - $10^{-12}$ , Fitted: $10^{-6.21}$ - $10^{-12.54}$ | fitted to data [1]                                           |
| $\kappa_2$                 | Between-patch coupling strength for Sierra Leone                               | km <sup><math>\iota</math></sup><br>persons <sup>-2</sup> | $10^{-8.27}$  | Initial: $10^{-8}$ - $10^{-12}$ , Fitted: $10^{-6.13}$ - $10^{-21.80}$ | fitted to data [1]                                           |
| $\kappa_3$                 | Between-patch coupling strength for Liberia                                    | km <sup><math>\iota</math></sup><br>persons <sup>-2</sup> | $10^{-8.62}$  | Initial: $10^{-8}$ - $10^{-12}$ , Fitted: $10^{-7.89}$ - $10^{-12.10}$ | fitted to data [1]                                           |
| $r_{1G}$                   | Recovery rate of persons in $I_1$ in Guinea                                    | days <sup>-1</sup>                                        | 0.0578        | Calculated from $\Delta_G, \Delta_2, k_{21}$                           | fitted to data [1]<br>(See $\Delta_G, \Delta_2, k_{21}$ )    |
| $r_{1SL}$                  | Recovery rate of persons in $I_1$ in Sierra Leone                              | days <sup>-1</sup>                                        | 0.1090        | Calculated from $\Delta_{SL}, \Delta_2, k_{21}$                        | fitted to data [1]<br>(See $\Delta_{SL}, \Delta_2, k_{21}$ ) |
| $r_{1L}$                   | Recovery rate of persons in $I_1$ in Liberia                                   | days <sup>-1</sup>                                        | 0.0566        | Calculated from $\Delta_L, \Delta_2, k_{21}$                           | fitted to data [1]<br>(See $\Delta_L, \Delta_2, k_{21}$ )    |
| $r_2$                      | Recovery rate of persons in $I_2$                                              | days <sup>-1</sup>                                        | 0.0209        | Calculated from $\Delta_2, k_{02}$                                     | [5, 7]                                                       |
| $\gamma_G$                 | Rate and proportion of movement of persons from $I_1$ to $I_2$ in Guinea       | days <sup>-1</sup>                                        | 0.1243        | Calculated from $\Delta_G, \Delta_2, k_{21}$                           | fitted to data [1]<br>(See $\Delta_G, \Delta_2, k_{21}$ )    |
| $\gamma_{SL}$              | Rate and proportion of movement of persons from $I_1$ to $I_2$ in Sierra Leone | days <sup>-1</sup>                                        | 0.0732        | Calculated from $\Delta_{SL}, \Delta_2, k_{21}$                        | fitted to data [1]<br>(See $\Delta_{SL}, \Delta_2, k_{21}$ ) |
| $\gamma_L$                 | Rate and proportion of movement of persons from $I_1$ to $I_1$ in Liberia      | days <sup>-1</sup>                                        | 0.1256        | Calculated from $\Delta_L, \Delta_2, k_{21}$                           | fitted to data [1]<br>(See $\Delta_L, \Delta_2, k_{21}$ )    |
| $\rho_n$                   | Population in patch $n$                                                        | persons                                                   | –             | Fixed for each country                                                 | [54]                                                         |
| $d_{n,m}$                  | distance between patch $n$ and $m$                                             | km                                                        | –             | fixed for each combination of patches                                  | [37]                                                         |
| $k_{norm}$                 | Correction factor for reporting rate, population at risk, and other factors    | unitless                                                  | 0.0030        | 0.001-0.1                                                              | Sampled                                                      |

Table A2: Parameter values for the district-level model.

| Parameter     | Definition                                                                     | Units                                                  | Value                                 | Sources                                                         |
|---------------|--------------------------------------------------------------------------------|--------------------------------------------------------|---------------------------------------|-----------------------------------------------------------------|
| $\alpha$      | Transition rate from $E$ to $I_1$                                              | days <sup>-1</sup>                                     | 0.1059                                | [5, 58]                                                         |
| $\beta_{1G}$  | Transmission rate for $I_1$ in Guinea                                          | persons <sup>-1</sup> days <sup>-1</sup>               | 0.0950                                | fitted to data [1]                                              |
| $\beta_{1SL}$ | Transmission rate for $I_1$ in Sierra Leone                                    | persons <sup>-1</sup> days <sup>-1</sup>               | 0.0504                                | fitted to data [1]                                              |
| $\beta_{1L}$  | Transmission rate for $I_1$ in Liberia                                         | persons <sup>-1</sup> days <sup>-1</sup>               | 0.1555                                | fitted to data [1]                                              |
| $\beta_R$     | Ratio of $I_1$ transmission to $I_2$ and $F$ transmission                      | none                                                   | 2                                     | [5, 15]                                                         |
| $\Delta_G$    | Mortality for infected persons in Guinea                                       | none                                                   | 0.6643                                | fitted to data [1]                                              |
| $\Delta_{SL}$ | Mortality for infected persons in Sierra Leone                                 | none                                                   | 0.3910                                | fitted to data [1]                                              |
| $\Delta_L$    | Mortality for infected persons in Liberia                                      | none                                                   | 0.6710                                | fitted to data [1]                                              |
| $\Delta_2$    | Fraction of persons in $I_2$ that dies                                         | none                                                   | 0.97                                  | [5, 7]                                                          |
| $\delta_2$    | Burial rate                                                                    | days <sup>-1</sup>                                     | 0.9                                   | [31]                                                            |
| $k_{02}$      | 1/duration of $I_2$                                                            | days <sup>-1</sup>                                     | 0.8                                   | [5, 34]                                                         |
| $k_{21}$      | 1/duration of $I_1$                                                            | days <sup>-1</sup>                                     | 0.2                                   | [2, 34]                                                         |
| $\gamma_G$    | Rate and proportion of movement of persons from $I_1$ to $I_2$ in Guinea       | days <sup>-1</sup>                                     | 0.1370                                | fitted to data [1] (See $\Delta_G$ , $\Delta_2$ , $k_{21}$ )    |
| $\gamma_{SL}$ | Rate and proportion of movement of persons from $I_1$ to $I_2$ in Sierra Leone | days <sup>-1</sup>                                     | 0.0806                                | fitted to data [1] (See $\Delta_{SL}$ , $\Delta_2$ , $k_{21}$ ) |
| $\gamma_L$    | Rate and proportion of movement of persons from $I_1$ to $I_1$ in Liberia      | days <sup>-1</sup>                                     | 0.1384                                | fitted to data [1] (See $\Delta_L$ , $\Delta_2$ , $k_{21}$ )    |
| $\iota$       | Distance exponent                                                              | unitless                                               | 2                                     | fixed                                                           |
| $\kappa$      | Between-patch coupling strength                                                | km <sup><math>\iota</math></sup> persons <sup>-2</sup> | 10 <sup>-8.5</sup>                    | fitted to data [1]                                              |
| $\rho_n$      | Population in patch $n$                                                        | persons                                                | Fixed for each district               | [54]                                                            |
| $d_{n,m}$     | distance between patch $n$ and $m$                                             | km                                                     | fixed for each combination of patches | [37]                                                            |
| $k_{norm}$    | Correction factor for reporting rate, population at risk, and other factors    | unitless                                               | Varies by patch                       | Fitted to data (see Table A3)                                   |

| District                                          | $k_{norm}$ | Population size | District                                           | $k_{norm}$ | Population size |
|---------------------------------------------------|------------|-----------------|----------------------------------------------------|------------|-----------------|
| Conakry, Guinea                                   | 0.0003366  | 1667864         | Macenta, Nzerekore, Guinea                         | 0.0101     | 298282          |
| Boffa, Guinea                                     | 0.000923   | 211063          | Nzerekore, Guinea                                  | 0.003181   | 396118          |
| Boke, Boke, Guinea                                | 0.0000178  | 449405          | Yomou, Guinea                                      | 0.0006865  | 176664          |
| Coyah, Coyah Prefecture, Kindia, Guinea           | 0.0010564  | 264164          | Kailahun, Sierra Leone                             | 0.0522204  | 358190          |
| Dubreka, Dubreka Prefecture, Kindia, Guinea       | 0.0004088  | 328418          | Kenema, Sierra Leone                               | 0.0367377  | 497948          |
| Forecariah, Forecariah prefecture, Kindia, Guinea | 0.0012858  | 244649          | Koidu, Sierra Leone                                | 0.0693104  | 335401          |
| Fria, Kindia, Guinea                              | 0.000251   | 96527           | Makeni, Sierra Leone                               | 0.0574733  | 408390          |
| Kindia, Guinea                                    | 0.0006273  | 438315          | Kambia, Northern Province, Sierra Leone            | 0.010676   | 270462          |
| Telimele, Mamou, Guinea                           | 0.0012841  | 283639          | Kabala, Koinadugu, Northern Province, Sierra Leone | 0.0510831  | 265758          |
| Dalaba, Mamou, Guinea                             | 0.0012756  | 136320          | Port Loko, Northern Province, Sierra Leone         | 0.0496909  | 453746          |
| Gaoual, Boke, Guinea                              | 0.0000592  | 194245          | Magburaka, Northern Province, Sierra Leone         | 0.0379865  | 347197          |
| Koubia, Labe, Guinea                              | 0.0001577  | 101171          | Bo, Southern province, Sierra Leone                | 0.0312373  | 463668          |
| Koundara, Boke, Guinea                            | 0.0002082  | 130205          | Yagoi, Southern Province, Sierra Leone             | 0.0178945  | 139687          |
| Labe, Labe, Guinea                                | 0.0000129  | 318633          | Moyamba, Sierra Leone                              | 0.0571064  | 260910          |
| Lelouma, Lelouma Prefecture, Guinea               | 0.000053   | 162634          | Pujehun, Southern Province, Sierra Leone           | 0.0139538  | 228392          |
| Mali, Labe, Guinea                                | 0.0001403  | 290320          | Waterloo, Western Area, Sierra Leone               | 0.2759915  | 174249          |
| Mamou, Guinea                                     | 0.0000155  | 318738          | Freetown, Western Area, Sierra Leone               | 0.0495051  | 772873          |
| Pita, Mamou, Guinea                               | 0.0002863  | 277059          | Tubmanburg, Bomi, Liberia                          | 0.0079824  | 84119           |
| Tougue, Labe, Guinea                              | 0.0001236  | 122959          | Gbarnga, Bong, Liberia                             | 0.0032862  | 333481          |
| Dabola, Faranah, Guinea                           | 0.00135    | 182951          | Bopolu, Gbarpolu, Liberia                          | 0.0010959  | 83388           |
| Dinguiraye, Faranah, Guinea                       | 0.0001318  | 195662          | Buchanan, Grand Bassa, Liberia                     | 0.0017298  | 221693          |
| Faranah, Guinea                                   | 0.0033718  | 280511          | Robertsonport, Grand Cape Mount, Liberia           | 0.0057712  | 127076          |
| Kankan, Guinea                                    | 0.0007378  | 472112          | Zwedru, Grand Gedeh, Liberia                       | 0.0003692  | 125258          |
| Kerouane, Kankan, Guinea                          | 0.0125112  | 211017          | Barclayville, Grand Kru, Liberia                   | 0.0058913  | 57913           |
| Kouroussa, Faranah, Guinea                        | 0.0013535  | 268224          | Voinjama, Lofa, Liberia                            | 0.0044     | 276863          |
| Mandiana, Kankan, Guinea                          | 0.0000289  | 339527          | Kakata, Margibi, Liberia                           | 0.0101327  | 209923          |
| Siguiriri, Kankan, Guinea                         | 0.0005356  | 695449          | Harper, Maryland, Liberia                          | 0.0010889  | 135938          |
| Beyla, Nzerekore, Guinea                          | 0.0014797  | 325482          | Monrovia, Liberia                                  | 0.0058101  | 1118241         |
| Gueckedou, Nzerekore, Guinea                      | 0.006499   | 291823          | Sanniquellie, Nimba, Liberia                       | 0.0013842  | 462026          |
| Kissidougou, Faranah, Guinea                      | 0.0008     | 283609          | River Cess Town, Liberia                           | 0.0022723  | 71509           |
| Lola, Nzerekore, Guinea                           | 0.0033775  | 175213          | Fish Town, River Gee, Liberia                      | 0.0025472  | 66789           |
|                                                   |            |                 | Greenville, Sinoe, Liberia                         | 0.0023976  | 102391          |

Table A3: District total population sizes ( $\rho_n$ ) [54] and  $k_{norm}$  values used for the deterministic district-level model.

647 Additional Supplementary Files:

648 **Video S1.** A GIF representing the progression of Ebola according to the model from March 30,  
649 2014, to January 31, 2015. Color intensity of district represents number of cumulative cases in that  
650 district: darker color represents higher number of cases.

651

652 **Supplementary Figures S1-S8.** Stochastic district-level model simulation figures using reporting  
653 rate values  $r = 1, \frac{1}{2}, \frac{1}{5}, \frac{1}{10}, 3k_{norm}, 2k_{norm}, 1.5k_{norm}, k_{norm}$  (corresponding to population-at-risk  
654 sizes of  $f\rho_n = k_{norm}\rho_n, 2k_{norm}\rho_n, 5k_{norm}\rho_n, 10k_{norm}\rho_n, \frac{1}{3}\rho_n, \frac{1}{2}\rho_n, \frac{2}{3}\rho_n,$  and  $\rho_n$ ).
